# Supplementary material
Source: publisher figshare collection journal article supplement (https://acs.figshare.com/ndownloader/files/5657739)
Supplement: Supplementary file 1 [file 5657739]

1 **Supporting Information for**  
2 **New Insight into GO, Cd(II), Phosphate Interaction and Its Role in GO Colloidal**  
3 **Behavior**

4 Xuemei Ren<sup>#†</sup>, Qunyan Wu<sup>||</sup>, Huan Xu<sup>†</sup>, Dadong Shao<sup>†</sup>, Xiaoli Tan<sup>#†\*</sup>, Weiqun Shi<sup>||\*</sup>,  
5 Changlun Chen<sup>†</sup>, Jiaying Li<sup>†</sup>, Zhifang Chai<sup>||§</sup>, Tasawar Hayat<sup>†\*</sup>, Xiangke Wang<sup>#†§\*</sup>

6 <sup>#</sup>School of Environment and Chemical Engineering, North China Electric Power University,  
7 Beijing 102206, P.R. China; <sup>†</sup>Institute of Plasma Physics, Chinese Academy of Sciences, P.O. Box  
8 1126, 230031, Hefei, P.R. China; <sup>‡</sup>NAAM Research Group, Faculty of Science, King Abdulaziz  
9 University, Jeddah 21589, Saudi Arabia; <sup>§</sup>Collaborative Innovation Center of Radiation Medicine  
10 of Jiangsu Higher Education Institutions, P.R. China; <sup>||</sup>Laboratory of Nuclear Energy Chemistry  
11 and Key Laboratory for Biomedical Effects of Nanomaterials and Nanosafety, Institute of High  
12 Energy Physics, Chinese Academy of Sciences, Beijing, 100049, China; & Department of  
13 Mathematics, Quaid-I-Azam University, Islamabad 44000, Pakistan

14  
15 \*: Corresponding author. Tel: +86-10-61772890; Fax: +86-10-61772890; Email:  
16 [xkwang@ipp.ac.cn](mailto:xkwang@ipp.ac.cn) (X. Wang); [tanxl@ipp.ac.cn](mailto:tanxl@ipp.ac.cn) (X. Tan); [shiwq@ihep.ac.cn](mailto:shiwq@ihep.ac.cn) (W. Shi).

17  
18 **Environmental Science and Technology**  
19 **Supplemental Information, 28 Pages, 19 Figures, and 1 Table.**

20

## 21    **Batch Experiments**

22    The sorption of Cd(II) and/or P(V) on GO were studied using batch technique in a set  
23    of vials equipped with Teflon-lined screw caps. The desired concentrations of  
24    different components were obtained by adding the GO stock suspension and the stock  
25    solution of Cd(II), NaCl, and/or P(V) into the vials. Negligible volumes of 0.01 or 0.1  
26    mol/L HCl or NaOH were added to the suspensions in each vial to achieve the desired  
27    initial pH values (2.0 – 12.0). After the vials involving these mixtures were put on a  
28    horizontal shaker and shaken at a constant speed of 120 rpm for 24 h, these vials were  
29    placed on a flat surface for 12 h without any disturbance to make sure of the complete  
30    settlement of the large sized GO aggregates. Finally, the residual concentrations of  
31    GO in the supernatant (mg/L) were measured by using UV-vis spectrophotometer  
32    (UV-2550, Perkin-Elmer) at a wavelength of 227 nm.<sup>1</sup> For the determination of  
33    unsorbed Cd(II)/P(V) concentrations in supernatant, the liquid and solid phases were  
34    separated by centrifugation at 15000 rpm for 20 min, and then the supernatants were  
35    filtered through 0.22 µm filtering membrane. The Cd(II) concentration in the  
36    supernatant was determined by the atomic absorption spectrophotometry. The  
37    phosphate concentration in the supernatant was determined by the blue  
38    phosphate-molybdate complex at the wavelength of 700 nm. The removal  
39    percentages of Cd(II) or P(V) on GO were calculated from the difference between the  
40    initial concentration ( $C_0$ , mmol/L) and the final one ( $C_e$ , mmol/L) (Removal  
41    percentage (%) =  $(C_0 - C_e)/C_0 \times 100\%$ ). All the experimental data were averages of

triplicate determinations, and the relative errors of the data were approximately 5%.

**Theoretical Calculation.**

For simplification, a graphene 5×4 supercell with the lattice constant of 2.46 Å modified by a hydroxyl group on the surface was employed as a computational model,<sup>2, 3</sup> shown in Figure S2. The dangling bonds of the graphene fragment were saturated by adding hydrogen atoms. To optimize the geometry, the quasi-relativistic small-core pseudo-potential ECP28MWB and associated ECP28MWB valence basis sets were adopted for cadmium,<sup>4</sup> while the 6-31G(d) basis set was applied for the other light atoms H, C, O and P. The neutral GO and deprotonated GO (dGO) were considered to simulate qualitatively low and high pH solution state, respectively. A hexa-coordinated  $[\text{Cd}(\text{H}_2\text{O})_6]^{2+}$  is the dominant species in aqueous, hence, the coordination number of Cd(II) cation are set to 6 for all initial optimized structures. Based on the different addition sequences in experiment, the structures of  $[\text{Cd}(\text{H}_2\text{O})_6]^{2+}$ ,  $[\text{Cd-P-5H}_2\text{O}]^+$ ,  $[\text{GO-Cd-5H}_2\text{O}]^{2+}$ , and  $[\text{GO-Cd-P-4H}_2\text{O}]^+$ , and the corresponding deprotonated states were optimized at the B3LYP/6-31G(d) level of theory in the aqueous state. Their Gibbs free energies, including the thermal contribution, obtained at the same level were used to calculate the change of the Gibbs free energies of the reactions, which can indicate the relative binding ability of the GO with Cd(II).

### 63    **Effect of Ionic Strength on Cd(II)/P(V) Removal**

64    Evaluation of ionic strength effect on sorption behavior is an effective macroscopic  
65    method of inferring sorption mechanisms. To help compare and analyze the role of  
66    ionic strength variation, experiments are conducted to determine the sorption of Cd(II)  
67    on GO in 0.001 and 0.01 mol/L NaCl electrolyte solutions since the fact that  $\text{Cl}^-$  is the  
68    common ion in aqueous environment. One can see from Figure S3 that the removal  
69    percentage of Cd(II) on GO is not affected by ionic strength. It is well known that ion  
70    exchange or outer-sphere surface complexation is affected by ionic strength, whereas  
71    inner-sphere surface complexation is influenced by pH values.<sup>5, 6</sup> From the ionic  
72    strength independence, one can deduce that inner sphere complexation of Cd(II) with  
73    oxygen containing functional groups of GO is the main mechanism for Cd(II) removal  
74    by GO in the presence of P(V). Similarly, the P(V) removal is independent of ionic  
75    strength (Figure S14), suggesting surface complexation or strong chemical sorption is  
76    the dominate mechanism for P(V) removal by GO in the presence of Cd(II).

### 77    **Size distributions of GO**

78    The size distributions of the GO particles as a function of pH values in different  
79    systems have been monitored by a Zetasizer Nano-ZS90 Instrument (Malvern Co.,  
80    U.K.) at 25 °C and presented in Figure S5. The responses of average sizes of GO in  
81    the 1 mmol/L NaCl solution and solution containing 1 mmol/L NaCl and phosphate  
82    (0.3 mmol/L P) to varying pH are contrary to those of residual concentrations of GO  
83    nanosheets in the supernatant (Figure 2A), with GO average sizes being quite constant

84 (~220 nm) from pH 4.0 to 12.0, then increasing sharply as pH decreases from 4.0 to  
85 2.0. This increased average sizes (>1000 nm) below pH 4 are due to a reduction in the  
86 hydrophilicity of GO. The average sizes of GO in the presence of Cd(II) and  
87 Cd(II)+P(V) are very large in the pH range of 4.0 – 12.0. These is consistent with the  
88 results that the noticeable aggregations of GO in the presence of Cd(II) and  
89 Cd(II)+P(V) are observed in the whole tested pH ranges (Figure 2B in the manuscript).  
90 Figure S5 also shows that the average sizes of GO in solution containing Cd(II) and  
91 phosphate are larger than that of GO in solution only containing Cd(II), which is  
92 inconsistent with visual images of GO aggregate in solution only containing Cd(II)  
93 and in solution containing Cd(II) and phosphate (Figure 4B in the manuscript). We  
94 think the visual images of GO aggregate showed in Figure 4B are more credible.  
95 The larger GO aggregates are easier to sediment. The fast depositions of the large GO  
96 aggregate in the solution containing Cd(II) make them escape detection by particle  
97 size analyzer. Although particle size analyzer can provide the trend of GO size  
98 perturbations, it is not the accurate method to determine the actual GO sizes.

#### 99 **Effect of Initial Cd(II)/P(V) Concentration on P(V)/Cd(II) Removal**

100 The batch experiments as a function of the Cd(II)/P(V) initial concentrations (Cd:P  
101 ratio) were conducted by taking different concentrations of Cd(II)/P(V) at a fixed  
102 initial pH ( $7.50 \pm 0.05$ ). The presence of Cd(II) can bridge negatively charged GO and  
103 P(V) anions, compress the double layer, neutralize negative charges of GO and P(V),  
104 and thus increase the affinity between P(V) and GO. Besides, Cd(II) can form

precipitate with P(V). In the presence of Cd(II), the retention percentage of P(V) (0.3 mmol/L P, pH 7.5) on GO increases from ~0% to ~40% as initial Cd(II) concentration increases from 0.07 to 0.25 mmol/L, and then maintains unchanged at Cd(II) concentration higher than 0.25 mmol/L (Figure S6). With the increase of initial Cd(II) concentration, more and more Cd(II) ions can form complexes with GO and provide more sorption sites for P(V), resulting in an increase of P(V) retention on GO through the formation of type A ternary surface complexes with Cd(II) as the bridge molecular. With the further increase of initial Cd(II) concentration, more Cd(II) ions can form precipitate with the limited P(V). This also leads to the increase of P(V) retention. However, the results of our addition sequences effect on the GO stability suggest that the formation of precipitate can stable GO. While, there is almost no GO in the supernatant in the presence of Cd(II) regardless of P(V) initial concentration. Therefore, the formation of Cd–P precipitate can be excluded. In contrast, the different initial concentrations of P(V) (0.03 – 0.3 mmol/L P) has no effect on Cd(II) (0.3 mmol/L, pH 7.5) retention on GO (Figure S7). The dependence of P(V) sorption on Cd(II) initial concentration and the independence of Cd(II) sorption on P(V) initial concentration further support the formation of type A ternary surface complexes, where Cd(II) bridges the GO surfaces and P(V) ions.

### **Sorption Isotherms of P(V) on GO**

Figure S11 shows the sorption isotherms of P(V) on GO in the absence and presence of Cd(II) ( $C_s = (C_0 - C_e)/m_{GO} \times V$ , where  $C_s$  (mmol/g) was the concentration of P(V)

126 sorbed on GO,  $V$  (L) was the volume of the suspension, and  $m_{GO}$  (g) was the mass of  
127 the sorbents). One can see that in the absence of Cd(II), no P(V) ions were sorbed on  
128 GO at low P(V) concentrations. While the sorption of P(V) ions on GO increased with  
129 increasing P(V) concentration at high P(V) concentrations. This observed  
130 phenomenon may be attributed to P(V) form precipitates with the residual  $Mn^{2+}$  in  
131 GO suspension from GO preparation at high P(V) concentrations. The sorption  
132 isotherm of P(V) on GO in ternary system containing Cd(II) is higher than that of P(V)  
133 on GO in binary system without Cd(II). The positive effect of Cd(II) on P(V) sorption  
134 can be explained by Cd(II) complexation with oxygen containing functional groups of  
135 GO, reducing the electronegativity of GO and providing the sorptive sites for P(V), or  
136 by Cd(II) complexation with P(V), forming Cd-P aqueous complexes which have  
137 higher affinity to GO as compared with P(V), or by the formation of Cd-P  
138 precipitates. The first two suggests a surface-binding of P(V) through Cd(II) “bridge”  
139 between the GO surface and P(V). According to the Visual MINTEQ calculation  
140 (Figure S16), the  $Cd_3(PO_4)_2$  become the thermodynamically favored phase with the  
141 increase of P(V) concentration. However, as mentioned above, there is almost no GO  
142 in the supernatant in the presence of Cd(II) regardless of initial P(V) concentration.  
143 Therefore, the formation of  $Cd_3(PO_4)_2$  precipitate can be excluded. One can deduce  
144 that the enhanced sorption of P(V) by Cd(II) is mainly due to the formation of type A  
145 ternary surface complexes, and that the sorption of Cd(II) on GO occurs more quickly  
146 than its precipitation. The latter suggests that the presence of GO will hinder the

147 formation of  $\text{Cd}_3(\text{PO}_4)_2$  precipitate.

#### 148 **Sorption Isotherms of Cd(II) on GO**

149 The sorption of Cd(II) on GO as a function of Cd(II) concentration in the absence and  
150 presence of P(V) was studied at pH 7.5 by varying Cd(II) concentration from 0.07 to  
151 0.4 mmol/L, while keeping all other parameters constant. As shown in Figure S15, the  
152 sorption of Cd(II) is found to decrease in the order of ternary (GO+Cd+P) system >  
153 binary (GO+Cd) system. In both systems, the sorption capacity first increases rapidly  
154 and then increases slowly with increasing Cd(II) equilibrium concentration, which  
155 belongs to an L-type isotherm. At low initial Cd(II) solution concentration, the  
156 surface area and the availability of sorption sites are relatively high, and the Cd(II)  
157 ions are easily sorbed and removed. At higher Cd(II) initial solution concentration, the  
158 total available sorption sites are limited, thus resulting in a slow increase in the  
159 sorption capacity of GO. The sorption capacity in ternary (GO+Cd+P) system  
160 increases much more rapidly than that in binary (GO+Cd) system, which may be  
161 attributed to the formation of type A ternary surface complex or  $\text{Cd}_3(\text{PO}_4)_2$  precipitate.  
162 As shown in Figure S16, as the initial P(V) concentration is higher than 0.003 mmol/L  
163 P,  $\text{Cd}_3(\text{PO}_4)_2$  precipitate become thermodynamically favored phase for an aqueous  
164 system containing 0.001 mol/L NaCl and 0.3 mmol/L Cd(II) in contact with an  
165 atmosphere containing 0.00035 atm  $\text{CO}_2$  at pH 7.5, based on MINTEQA2 calculation.  
166 The Langmuir isotherm model was used in the present study to describe and  
167 understand the sorption mechanism. The sorption experimental data of Cd(II) onto



GO in the absence of P(V) fit the Langmuir model well, while that of Cd(II) onto GO in the presence of P(V) cannot, indicating the sorption of Cd(II) onto GO in the presence of P(V) may not be monolayer formation on a homogeneous surface. This further support that the exposed P(V) in type A ternary surface complexes as a bridge between the sorbed Cd(II) and the dissolved one and/or the formation the Cd-P precipitate.

#### **UV-vis Absorption Spectra of GO, Cd(II), P(V), GO with Cd(II), and GO with Cd(II) and P(V)**

The UV-vis absorption spectra of GO, Cd(II), P(V), GO with Cd(II), and GO with Cd(II) and P(V) are shown in Figure S17. The Cd(II) and P(V) do not have a characteristic peak within the studied wavelength range (200 – 600 nm). GO has a characteristic peak at 227 nm. Meanwhile, the presence of Cd(II) and P(V) does not change the shape of GO's UV-vis absorption spectrum and characteristic peak. These results indicate that the presence of Cd(II) and P(V) does not affect the UV-vis measurement of GO.

#### **Effect of Initial Cd(II) Concentration on GO Colloidal Behavior**

The effect of initial Cd(II) concentration on GO colloidal behavior in the absence and presence of P(V) was studied at pH 7.5 by varying Cd(II) concentration from 0.067 to 0.4 mmol/L. Figure S18A shows that the increase of Cd(II) initial concentration decreases the GO concentration in solution. In the presence of P(V), the values of GO concentration decrease from 25 mg/L to ~ 2 mg/L as initial Cd(II) concentration

189 increases from 0.1 to 0.25 mmol/L, and then maintain unchanged at Cd(II)  
190 concentration higher than 0.25 mmol/L (Figure S18A). No matter whether the P(V)  
191 presents or not, Cd(II) can compress the electric double layer of GO, neutralize  
192 negative charges of GO, and coordinate with the oxygen containing groups of GO,  
193 resulting in destroying the stability of GO in solution. With the increase of initial  
194 Cd(II) concentration, more and more Cd(II) ions could interact with GO and make  
195 more GO aggregate, resulting in a decrease of the GO concentration in solution. At  
196 the low initial Cd(II) concentration of 0.15 mmol/L, the excess amounts of P(V) (0.3  
197 mmol/L P) weaken the effectiveness of Cd(II) in destabilizing GO, so the value of GO  
198 concentration in the presence of P(V) is higher than that in the absence of P(V). At the  
199 initial Cd(II) concentration high than 0.15 mmol/L, the presence of P(V) has no  
200 notable effect on the colloidal behavior of GO in the Cd(II) aqueous solution.

#### 201 **Effect of Initial P(V) Concentration on GO Colloidal Behavior**

202 The change in the GO concentration as a function of P(V) concentration in the  
203 absence and presence of Cd(II) was studied at pH 7.5 by varying P(V) concentration  
204 from 0.03 to 0.3 mmol/L P. Figure S18C showed both in the absence and presence of  
205 Cd(II), the initial P(V) concentration had no effect on the values of GO concentration.  
206 In the absence of Cd(II), the behaviors of the GO aggregation can be described as a  
207 balance between the anion ( $\text{Cl}^-$  and  $\text{H}_2\text{PO}_4^-$ ) and cation ( $\text{Na}^+$ ) interfacial  
208 concentrations. On one hand, the  $\text{Na}^+$  concentrations increased from 1.03 to 1.3  
209 mmol/L with increasing P(V) initial concentration, which is far below the critical

210 coagulation concentration values of GO (44 mmol/L NaCl reported by Chowdhury  
211 and coworkers<sup>7</sup> and 188 mmol/L NaCl reported by Wu and coworkers<sup>8</sup>). On the other  
212 hand, the presence of  $\text{H}_2\text{PO}_4^-$  can weaken the effectiveness of  $\text{Na}^+$  in destabilizing  
213 GO.<sup>1</sup> So, in the absence of Cd(II), GO is highly stable in the whole tested P(V) initial  
214 concentration.

215 In the presence of Cd(II), the values of GO concentration decreased notably. The  
216 supernatants in all vials became transparent. The great effect of Cd(II) on  
217 destabilizing GO was mainly due to the binding capacity with oxygen-containing  
218 groups of GO nanosheets by  $\text{Cd}^{2+}$ . The sorption isotherms of P(V) on GO in the  
219 presence of Cd(II) (Figure S13) show that the presence of Cd(II) has a positive effect  
220 on P(V) sorption due to the formation of type A ternary surface complexes at low P(V)  
221 concentrations and/or to the formation of  $\text{Cd}_3(\text{PO}_4)_2$  precipitate at high P(V)  
222 concentrations. Based on the results of our addition sequences effect on the GO  
223 stability, the formation of precipitate can stable GO. However, there is almost no GO  
224 in the supernatant containing Cd(II) regardless of P(V) initial concentration (Figure  
225 S18D). Therefore, the formation of  $\text{Cd}_3(\text{PO}_4)_2$  precipitate can be excluded. And the  
226 enhancement of P(V) removal and the reduction of GO stability in the presence of  
227 Cd(II) for ternary system is mainly attributed to the formation of the type A ternary  
228 surface complexes under our experimental conditions.

## 229 **XPS Characterization and Analysis**

230 In order to determine surface element composition, the XPS spectra were recorded

231 using a Thermo Escalab 250 electron spectrometer with an Al K $\alpha$  radiation at 150 W.  
232 The XPS data were analyzed using the XPSPEAK software (version 4.1). The  
233 Gaussian–Lorentzian fitting were used following Shirley background subtraction.  
234 The XPS spectra of survey and high resolution scans for the C 1s, O 1s, Cd 3d, and P  
235 2p of GO before and after adsorption were shown in Figure S19. Deconvolution of the  
236 C 1s, O 1s, and Cd 3d spectra gives three peaks, three peaks, and two peaks,  
237 respectively. The peaks associated with oxygen functional groups in C 1s spectrum  
238 and the O 1s spectrum of GO without metal ions differs significantly from spectra for  
239 GO with adsorbed metal ions, both in the shape and the maximum position, providing  
240 the evidence that the oxygen–containing functional groups on the surface of GO take  
241 part in adsorption of metal ions. The slight differences (both in intensities and peak  
242 positions) can be observed for Cd 3d spectra without and with phosphate. Meanwhile,  
243 the occurrence of characteristic single peak of P 2p is observed in ternary system.  
244 Both suggest phosphate participate in Cd(II) adsorption in ternary system.  
245 Consideration the negatively charged GO and phosphate are electrostatically  
246 unfavorable, the formation of ternary surface complexes with Cd(II) as a bridge is the  
247 dominant mechanism.  
248 According to XPS analysis, the element compositions of each sample are summarized  
249 in Table S1. The GO has a high content of O concentration (about 26%), indicating  
250 the existence of many potential adsorption sites. The P content of the (GO+Cd+P)  
251 sample is found to be 3.95%. The ratio of Cd to P for this sample is found to be about

252 1.4, which is lower than that in  $\text{Cd}_3(\text{PO}_4)_2$  (1.5). Therefore, the  $\text{Cd}_3(\text{PO}_4)_2$  precipitate  
253 is not formed under this condition, in accordance with the results of batch experiments  
254 and GO stability, which indicate that the removal of  $\text{Cd}(\text{II})$  is not attributed to  
255  $\text{Cd}_3(\text{PO}_4)_2$  precipitation at  $\text{pH} < 9.5$  when  $\text{Cd}(\text{II})$ , phosphate and GO are added  
256 simultaneously. The ratio of Cd to P in the (GO+Cd+P) sample is higher than 1, which  
257 further supports our deduce that the exposed P(V) in type A ternary surface complexes  
258 can act as the new sorptive sites to adsorb the dissolved  $\text{Cd}(\text{II})$  in solution  
259 continuously via electrostatic attraction and complexation.

260

261

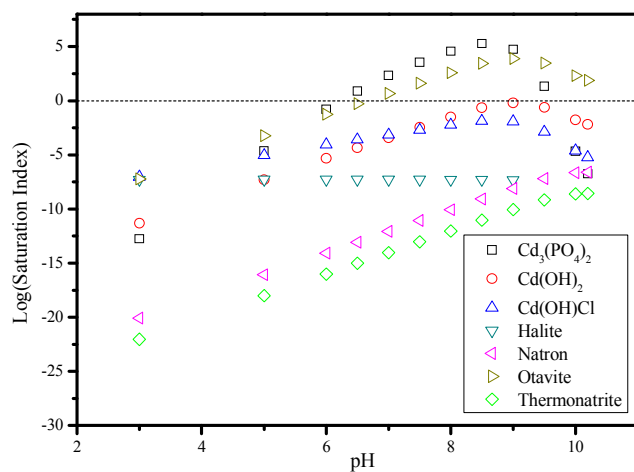

Figure S1. Saturation index of  $\text{Cd}_3(\text{PO}_4)_2$ ,  $\text{Cd}(\text{OH})_2$ ,  $\text{Cd}(\text{OH})\text{Cl}$ , halite, natron, otavite, and thermonatrite calculated using Visual MINTEQ for an aqueous system containing 0.001 mol/L NaCl, 0.3 mmol/L Cd(II), and 0.3 mmol/L P(V) in contact with an atmosphere containing 0.00035 atm  $\text{CO}_2$ .

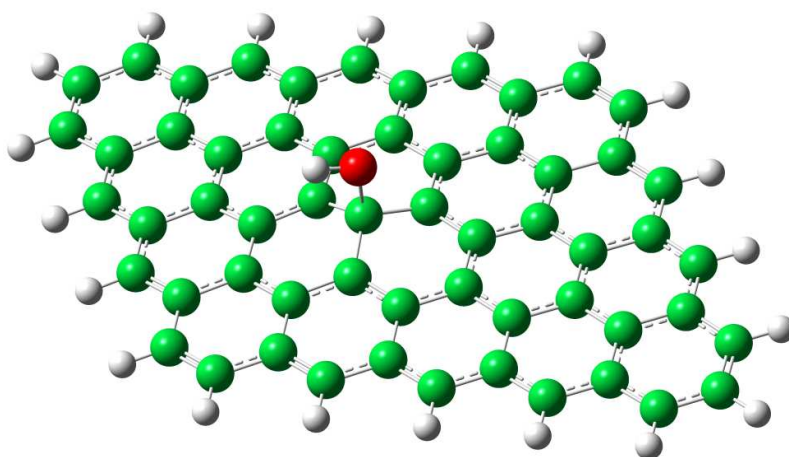

Figure S2. The graphene  $5 \times 4$  supercell with lattice constant of 2.46 Å size modified by a hydroxyl group on the surface for the computational model.

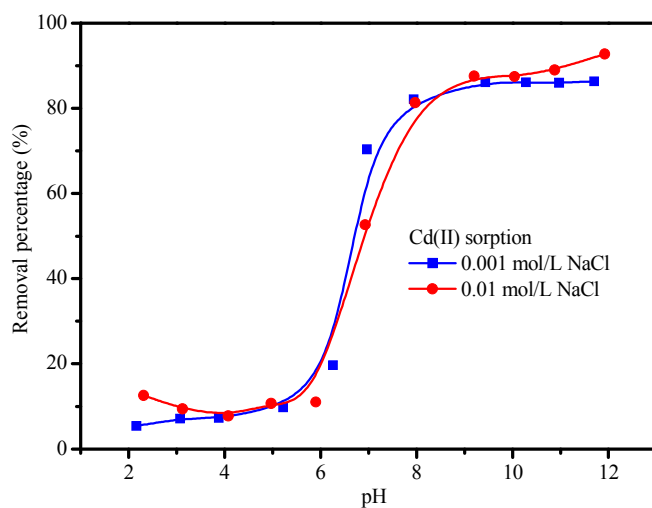

271

272 Figure S3 Effect of ionic strength on Cd(II) sorption on GO in the presence of P(V). T

273 =293 K,  $C_{GO(initial)} = 25 \text{ mg/L}$ ,  $C_{Cd(II)initial} = 0.3 \text{ mmol/L}$ , and  $C_{P(V)initial} = 0.3 \text{ mmol/L}$  P.

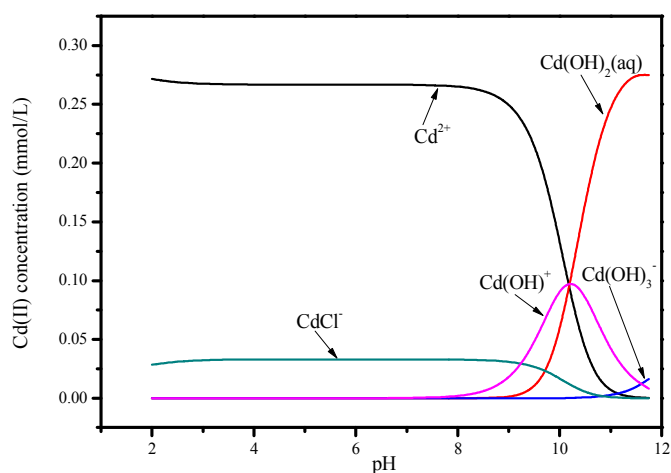

274

275 Figure S4 The concentrations of Cd(II) species at various pH values.  $C_{[Cd(II)]initial} = 0.3$

276 mmol/L. Cd(II) species were calculated by a chemical speciation model (Visual

277 MINTEQ version 3.0), which is downloaded freely from

278 <http://www2.lwr.kth.se/English/OurSoftware/vminteq/download.html>.

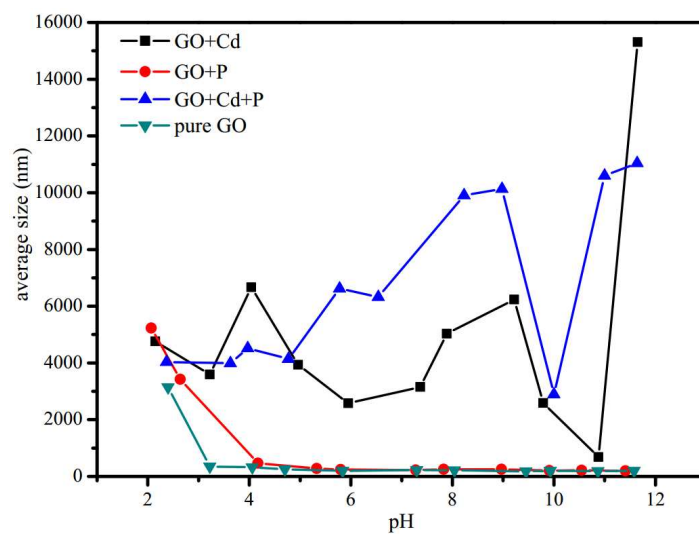

279

280

Figure S5 Size distribution of GO as a function of pH values in different systems.

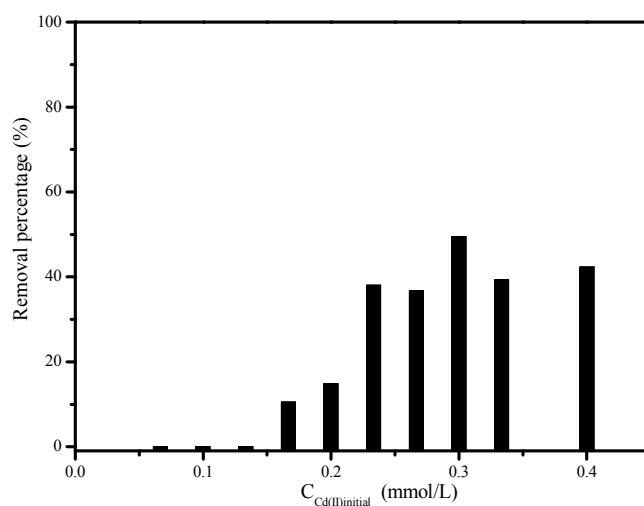

281

282 Figure S6 Effect of Cd(II) initial concentration on P(V) removal. pH = 7.5,  $C_{P(V) initial} =$

283 0.3 mmol/L P,  $C_{GO(initial)} = 25$  mg/L, and  $I = 0.001$  mol/L NaCl.



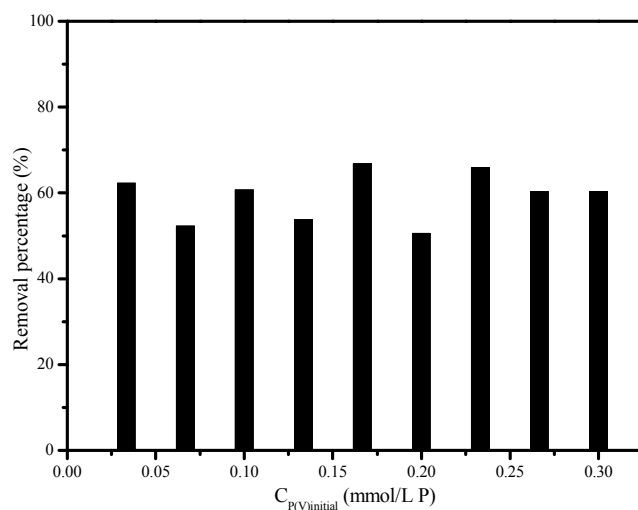

284

285 Figure S7 Effect of P(V) initial concentration on Cd(II) removal. pH = 7.5,  $C_{Cd(II)initial}$

286 = 0.3 mmol/L,  $C_{GO(initial)}$  = 25 mg/L, and  $I$  = 0.001 mol/L NaCl.

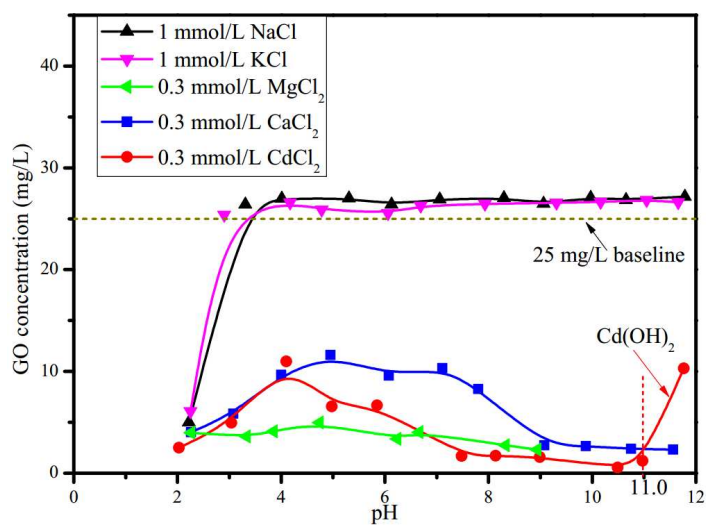

287

288 Figure S8 Residual concentrations of GO nanosheets in the supernatant as a function

289 of cation type.

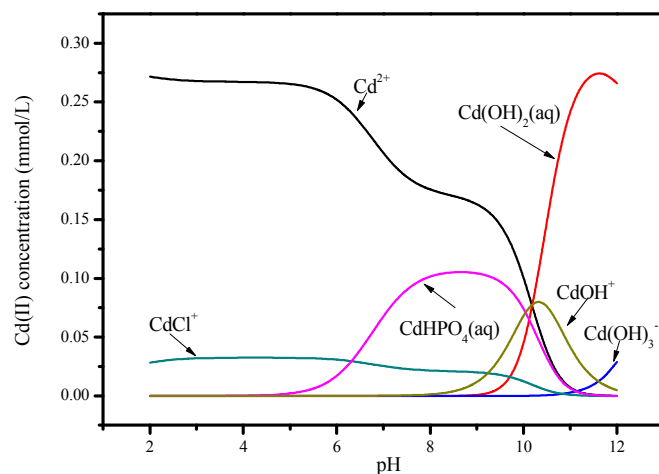

290

291 Figure S9 The concentrations of Cd(II) species in the presence of P(V) at various pH  
 292 values.  $C_{[\text{Cd(II)}]_{\text{initial}}} = 0.3\text{mmol/L}$  and  $C_{[\text{P(V)}]_{\text{initial}}} = 0.3\text{mmol/L}$ . Cd(II) species in the  
 293 presence of P(V) were calculated by a chemical speciation model (Visual MINTEQ  
 294 version 3.0), which is downloaded freely from  
 295 <http://www2.lwr.kth.se/English/OurSoftware/vminteq/download.html>.

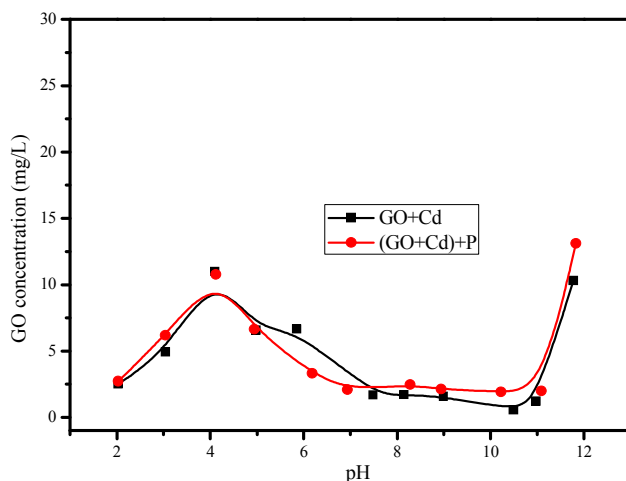

296

297 Figure S10 Effect of pH on the GO concentrations in GO+Cd and (GO+Cd)+P

298 systems.  $C_{\text{Cd(II)initial}} = 0.3 \text{ mmol/L}$ ,  $C_{\text{P(V)initial}} = 0.3 \text{ mmol/L}$  P,  $C_{\text{GO(initial)}} = 25 \text{ mg/L}$ , and  
 299  $I = 0.001 \text{ mol/L NaCl}$ .

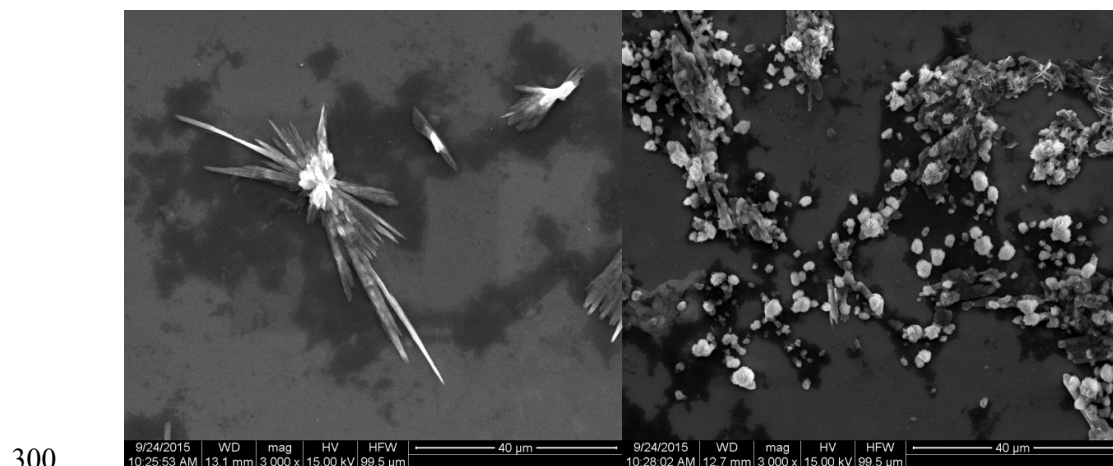

301 Figure S11 SEM images of GO aggregates in the Cd(II) (the left one) and Cd(II)+P(V)  
 302 (the right one) aqueous solutions.

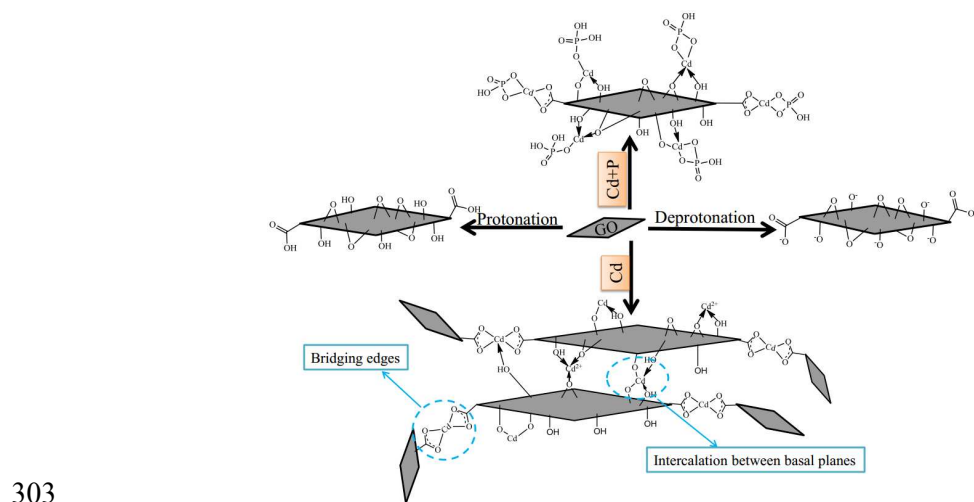

304 Figure S12 Interaction mechanisms of pH, Cd(II), and P(V) with GO.

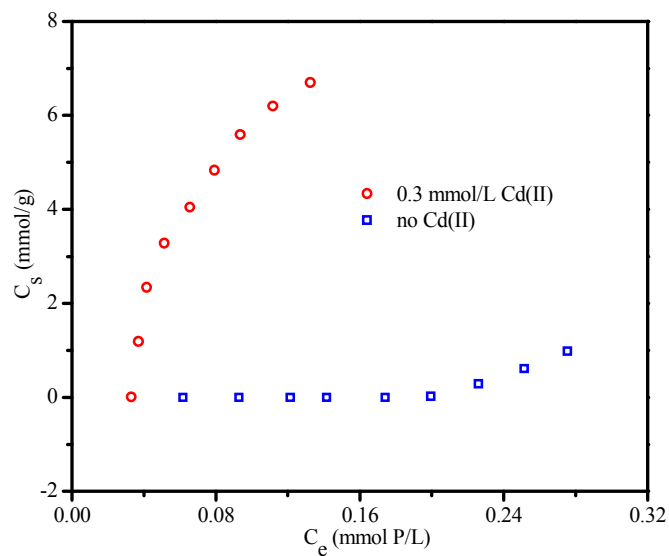

305

306 Figure S13 Sorption isotherms of P(V) on GO in the absence and presence of Cd(II).

307  $\text{pH} = 7.5$ ,  $C_{\text{Cd(II)initial}} = 0.3 \text{ mmol/L}$ ,  $C_{\text{GO(initial)}} = 25 \text{ mg/L}$ , and  $I = 0.001 \text{ mol/L NaCl}$ .

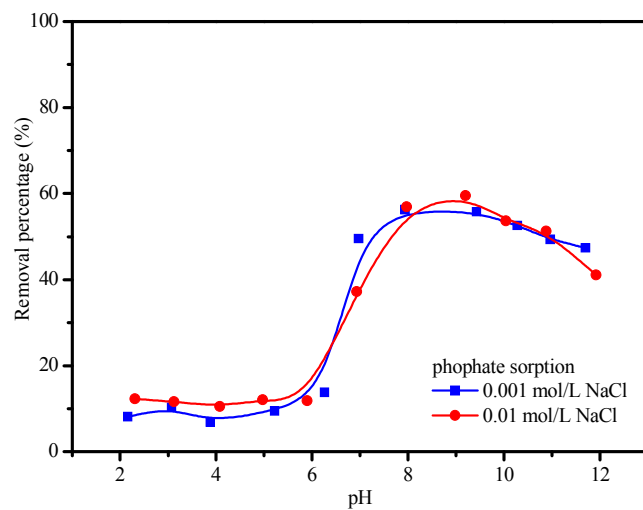

308

309 Figure S14 Effect of ionic strength on P(V) sorption on GO in the presence of Cd(II).

310  $C_{\text{GO(initial)}} = 25 \text{ mg/L}$ ,  $C_{\text{Cd(II)initial}} = 0.3 \text{ mmol/L}$ , and  $C_{\text{P(V)initial}} = 0.3 \text{ mmol/L P}$ .

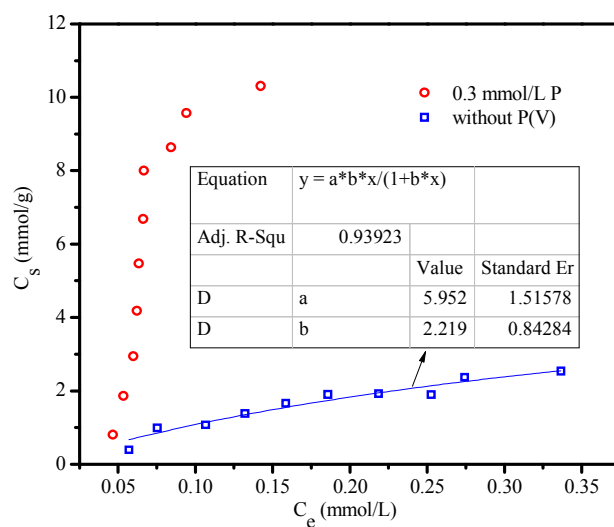

311

312 Figure S15 Sorption isotherms of Cd(II) on GO in the absence and presence of P(V).

313 pH = 7.5,  $C_{P(V)initial} = 0.3$  mmol/L P,  $C_{GO(initial)} = 25$  mg/L, and  $I = 0.001$  mol/L NaCl.

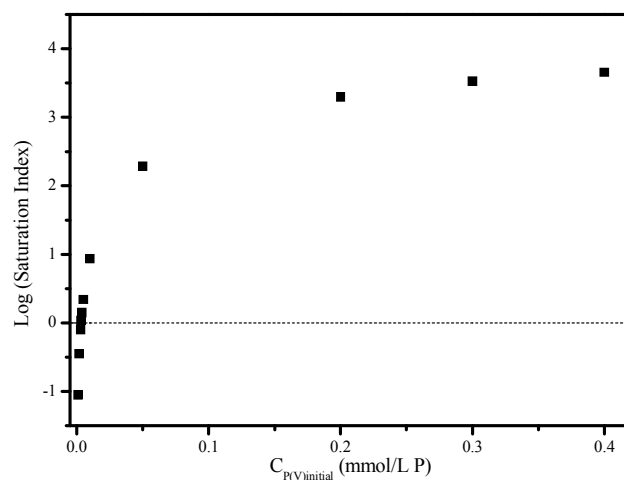

314

315 Figure S16 Saturation index of  $Cd_3(PO_4)_2$  as a function of initial P(V) concentration

316 calculated using Visual MINTEQ for an aqueous system containing 0.001 mol/L NaCl

317 and 0.3 mmol/L Cd(II) in contact with an atmosphere containing 0.00035 atm  $CO_2$  at

318 pH 7.5.

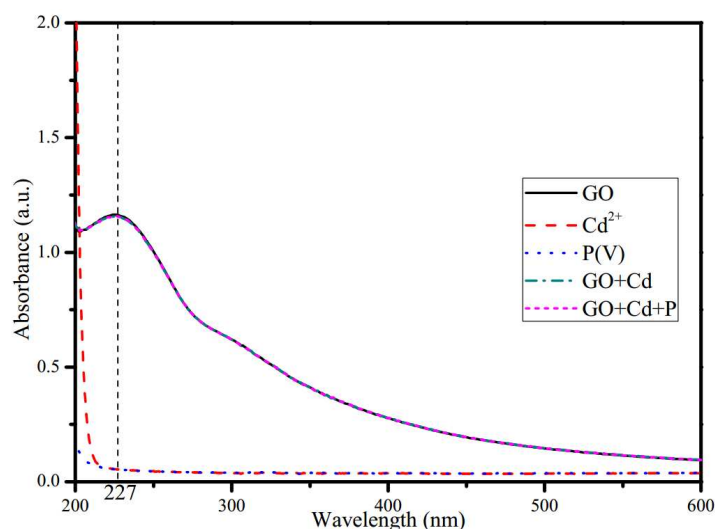

Figure S17 UV-vis absorption spectra of GO, Cd(II), P(V), GO with Cd(II), and GO with Cd(II) and P(V).

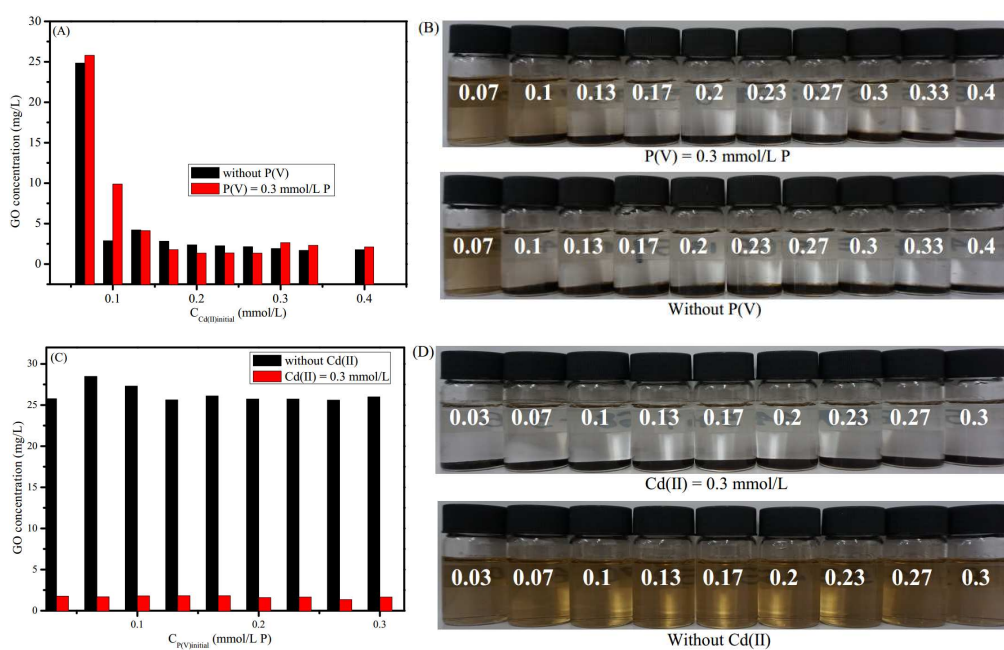

Figure S18 (A) Residual concentrations of GO nanosheets in the supernatant as a function of the Cd(II) initial concentration in the absence and presence of P(V); (B) Optical photograph showing the dispersion of GO as a function of the Cd(II) initial concentration in the absence and presence of P(V). pH = 7.5,  $C_{GO(initial)} = 25$  mg/L,  $C_{P(V)initial} = 0.3$  mmol/L P, and  $I = 0.001$  mol/L NaCl. (C) Residual concentrations of

GO nanosheets in the supernatant as a function of the P(V) initial concentration in the  
 absence and presence of Cd(II); (D) Optical photograph showing the dispersion of GO  
 as a function of the P(V) initial concentration in the absence and presence of Cd(II).  
 $\text{pH} = 7.5$ ,  $C_{\text{GO}(\text{initial})} = 25 \text{ mg/L}$ ,  $C_{\text{Cd(II)initial}} = 0.3 \text{ mmol/L}$ , and  $I = 0.001 \text{ mol/L NaCl}$ .

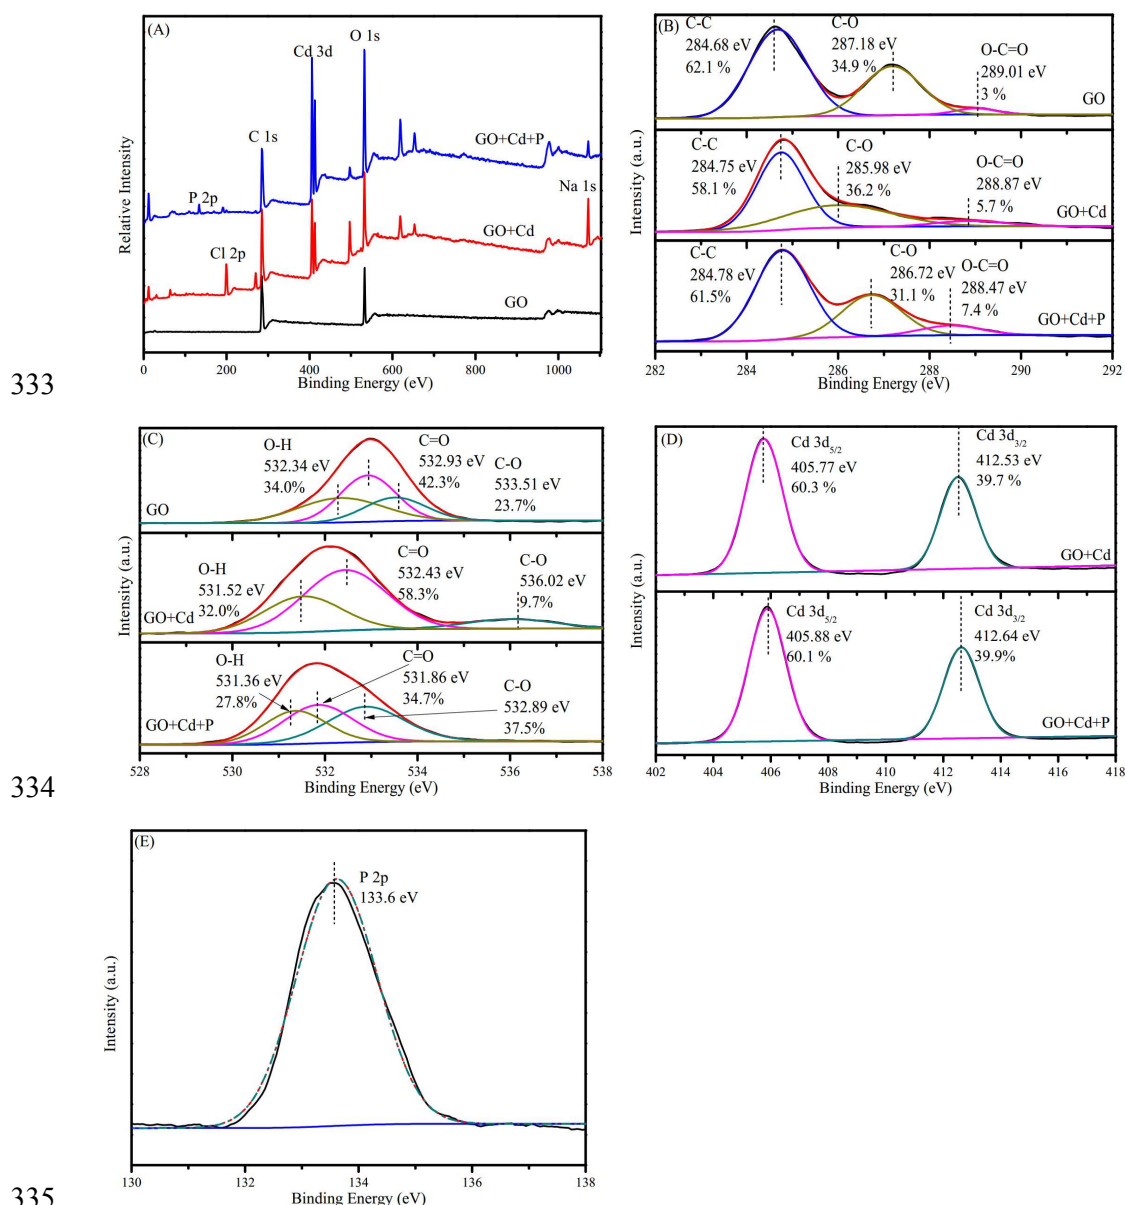

Figure S19 XPS survey scan and high resolution scans of GO, GO+Cd, and  
 GO+Cd+P. (A) Total survey scans, (B) C 1s peaks, (C) O 1s peaks, (D) Cd 3d peaks,

338 (E) P 2p peak.  $C_{GO} = 25 \text{ mg/L}$ ,  $\text{pH} = 7.5$ ,  $I = 0.001 \text{ mol/L NaCl}$ .

339

340

341

342



343 Table S1 Elemental compositions of GO before and after Cd(II) and phosphate  
 344 adsorption as determined through XPS

| Sample  | Element composition |       |       |      |       |       |
|---------|---------------------|-------|-------|------|-------|-------|
|         | C(%)                | O(%)  | Cd(%) | P(%) | Na(%) | Cl(%) |
| GO      | 74.21               | 25.79 | 0     | 0    | 0     | 0     |
| GO+Cd   | 60.96               | 22.18 | 2.99  | 0    | 5.98  | 7.89  |
| GO+Cd+P | 54.46               | 33.41 | 5.61  | 3.95 | 1.86  | 0.7   |

345

## 346 REFERENCES

- 347 (1) Ren, X. M.; Li, J. X.; Tan, X. L.; Shi, W. Q.; Chen, C. L.; Shao, D. D.; Wen, T.;  
 348 Wang, L. F.; Zhao, G. X.; Sheng, G. P.; Wang, X. K. Impact of Al<sub>2</sub>O<sub>3</sub> on the  
 349 aggregation and deposition of graphene oxide. *Environ. Sci. Technol.* **2014**, 48(10),  
 350 5493-5500.
- 351 (2) Wu, Q. Y.; Lan, J. H.; Wang, C. Z.; Zhao, Y. L.; Chai, Z. F.; Shi, W. Q.  
 352 Understanding the interactions of neptunium and plutonium ions with graphene oxide:  
 353 Scalar-relativistic DFT investigations. *J. Phys. Chem. A* **2014**, 118(44), 10273-10280.
- 354 (3) Wu, Q. Y.; Lan, J. H.; Wang, C. Z.; Xiao, C. L.; Zhao, Y. L.; Wei, Y. Z.; Chai, Z.  
 355 F.; Shi, W. Q. Understanding the bonding nature of uranyl ion and functionalized  
 356 graphene: A theoretical study. *J. Phys. Chem. A* **2014**, 118(11), 2149-2158.
- 357 (4) Martin, J. M. L.; Sundermann, A. Correlation consistent valence basis sets for use  
 358 with the Stuttgart-Dresden-Bonn relativistic effective core potentials: The atoms  
 359 Ga-Kr and In-Xe. *J. Chem. Phys.* **2001**, 114(8), 3408-3420.
- 360 (5) Yang, S. T.; Sheng, G. D.; Tan, X. L.; Hu, J.; Du, J. Z.; Montavon, G.; Wang, X.  
 361 K. Determination of Ni(II) uptake mechanisms on mordenite surfaces: A combined  
 362 macroscopic and microscopic approach. *Geochim. Cosmochim. Acta* **2011**, 75(21),  
 363 6520-6534.
- 364 (6) Tan, X. L.; Wang, X. K.; Geckeis, H.; Rabung, T. Sorption of Eu(III) on humic  
 365 acid or fulvic acid bound to hydrous alumina studied by SEM-EDS, XPS, TRLFS,  
 366 and batch techniques. *Environ. Sci. Technol.* **2008**, 42(17), 6532-6537.

- 367 (7) Chowdhury, I.; Duch, M. C.; Manuskhani, N. D.; Hersam, M. C.; Bouchard, D.  
368 Colloidal properties and stability of graphene oxide nanomaterials in the aquatic  
369 environment. *Environ. Sci. Technol.* **2013**, 47(12), 6288-6296.
- 370 (8) Wu, L.; Liu, L.; Gao, B.; Muñoz-Carpena, R.; Zhang, M.; Chen, H.; Zhou, Z.;  
371 Wang, H. Aggregation kinetics of graphene oxides in aqueous solutions: Experiments,  
372 mechanisms, and modeling. *Langmuir* **2013**, 29(49), 15174-15181.
- 373
